# Supplementary material for: Maize DNA Methylation in Response to Drought Stress Is Involved in Target Gene Expression and Alternative Splicing
Source: Int J Mol Sci. 2021 Jul 31;22(15):8285. doi: 10.3390/ijms22158285 (PMC8347047; doi:10.3390/ijms22158285)
Supplement: Supplementary file 1 [file ijms-22-08285-s001.zip › Supplemental Tables.xlsx]

## Sheet: Sheet1
Supplemental Table 1. Summary of MeDIP-seq in mazie root
Library type	Sample	Reads number (Paired-end/Single-End)	Mapping parameter	Mapping reads number	Mapping rate (%)
MeDIP-seq	AC7643(DT)-WW	97959184	Best match	94480477	96.4488
MeDIP-seq	AC7643(DT)-WS	97959184	Best match	94636971	96.6086
MeDIP-seq	AC7729/TZSRW(DS)-WW	97959184	Best match	94346843	96.3124
MeDIP-seq	AC7729/TZSRW(DS)-WS	97959184	Best match	94394721	96.3613
MeDIP-seq	RIL208(DT)-WW	97959184	Best match	94481852	96.4502
MeDIP-seq	RIL208(DT)-WS	97959184	Best match	94646251	96.618
MeDIP-seq	RIL64(DS)-WW	97959184	Best match	94264635	96.2285
MeDIP-seq	RIL64(DS)-WS	97959184	Best match	94292241	96.2567
MeDIP-seq	Total	783673472	Best match	755543991	96.4106
MeDIP-seq: methylated DNA immunoprecipitation sequencing

## Sheet: Sheet2
Supplemental Table 2. GO term enrichment of genes with DMR in promoter
Inberd lines	Position	GO term	Ontology	Description	Number in input list	Number in BG/Ref	p-value	FDR
drought-tolerant lines	Hypo-DMR in promoter 2K	GO:0005886	C	plasma membrane	36	2404	5.2e-06	0.0013
drought-tolerant lines	Hypo-DMR in promoter 2K	GO:0005773	C	vacuole	17	867	0.0001	0.013
drought-tolerant lines	Hypo-DMR in promoter 2K	GO:0030054	C	cell junction	12	547	0.00042	0.016
drought-tolerant lines	Hypo-DMR in promoter 2K	GO:0055044	C	symplast	12	547	0.00042	0.016
drought-tolerant lines	Hypo-DMR in promoter 2K	GO:0044459	C	plasma membrane part	14	663	0.00021	0.016
drought-tolerant lines	Hypo-DMR in promoter 2K	GO:0005911	C	cell-cell junction	12	547	0.00042	0.016
drought-tolerant lines	Hypo-DMR in promoter 2K	GO:0009506	C	plasmodesma	12	547	0.00042	0.016
drought-tolerant lines	Hypo-DMR in promoter 2K	GO:0000325	C	plant-type vacuole	5	109	0.0011	0.034
drought-sensitive lines	Hyper-DMR in promoter 2K	GO:0044464	C	cell part	778	12261	1.9e-07	6.6e-05
drought-sensitive lines	Hyper-DMR in promoter 2K	GO:0005623	C	cell	778	12261	1.9e-07	6.6e-05
drought-sensitive lines	Hyper-DMR in promoter 2K	GO:0044424	C	intracellular part	588	8943	4.1e-07	9.5e-05
drought-sensitive lines	Hyper-DMR in promoter 2K	GO:0005622	C	intracellular	614	9452	9.5e-07	0.00016
drought-sensitive lines	Hyper-DMR in promoter 2K	GO:0043227	C	membrane-bounded organelle	471	7016	1.7e-06	0.00023
drought-sensitive lines	Hyper-DMR in promoter 2K	GO:0043226	C	organelle	509	7692	2.4e-06	0.00024
drought-sensitive lines	Hyper-DMR in promoter 2K	GO:0043231	C	intracellular membrane-bounded organelle	469	6999	2.2e-06	0.00024
drought-sensitive lines	Hyper-DMR in promoter 2K	GO:0043229	C	intracellular organelle	508	7690	3.1e-06	0.00026
drought-sensitive lines	Hyper-DMR in promoter 2K	GO:0005737	C	cytoplasm	447	6663	4e-06	0.0003
drought-sensitive lines	Hyper-DMR in promoter 2K	GO:0044444	C	cytoplasmic part	409	6103	1.4e-05	0.001
drought-sensitive lines	Hyper-DMR in promoter 2K	GO:0005886	C	plasma membrane	171	2404	0.00071	0.045
drought-sensitive lines	Hypo-DMR in promoter 2K	GO:0016043	P	cellular component organization	53	1325	1.8e-05	0.035
drought-sensitive lines	Hypo-DMR in promoter 2K	GO:0009987	P	cellular process	313	12394	4.6e-05	0.046
drought-sensitive lines	Hypo-DMR in promoter 2K	GO:0005886	C	plasma membrane	81	2404	4.7e-05	0.021
drought-tolerant lines	Hypo-DMR in promoter 2-5K	GO:0010033	P	response to organic substance	27	1030	4e-05	0.042
drought-sensitive lines	Hyper-DMR in promoter 2-5K	GO:0030915	C	Smc5-Smc6 complex	7	9	7.8e-05	0.04
drought-sensitive lines	Hyper-DMR in promoter 2-5K	GO:0044424	C	intracellular part	798	8943	0.00023	0.04
drought-sensitive lines	Hyper-DMR in promoter 2-5K	GO:0043227	C	membrane-bounded organelle	641	7016	0.00015	0.04
drought-sensitive lines	Hyper-DMR in promoter 2-5K	GO:0043231	C	intracellular membrane-bounded organelle	640	6999	0.00014	0.04
drought-sensitive lines	Hyper-DMR in promoter 2-5K	GO:0005634	C	nucleus	281	2821	0.0002	0.04
drought-sensitive lines	Hypo-DMR in promoter 2-5K	GO:0043231	C	intracellular membrane-bounded organelle	350	6999	3.2e-06	0.0006
drought-sensitive lines	Hypo-DMR in promoter 2-5K	GO:0043229	C	intracellular organelle	379	7690	3.8e-06	0.0006
drought-sensitive lines	Hypo-DMR in promoter 2-5K	GO:0043227	C	membrane-bounded organelle	350	7016	4e-06	0.0006
drought-sensitive lines	Hypo-DMR in promoter 2-5K	GO:0043226	C	organelle	379	7692	3.9e-06	0.0006
drought-sensitive lines	Hypo-DMR in promoter 2-5K	GO:0005622	C	intracellular	447	9452	2.1e-05	0.0021
drought-sensitive lines	Hypo-DMR in promoter 2-5K	GO:0009536	C	plastid	132	2254	1.8e-05	0.0021
drought-sensitive lines	Hypo-DMR in promoter 2-5K	GO:0044424	C	intracellular part	419	8943	0.00012	0.01
drought-sensitive lines	Hypo-DMR in promoter 2-5K	GO:0009507	C	chloroplast	121	2136	0.00016	0.012
drought-sensitive lines	Hypo-DMR in promoter 2-5K	GO:0044422	C	organelle part	179	3457	0.00036	0.022
drought-sensitive lines	Hypo-DMR in promoter 2-5K	GO:0044446	C	intracellular organelle part	179	3454	0.00035	0.022
