# Supplementary figures and images for: Maize DNA Methylation in Response to Drought Stress Is Involved in Target Gene Expression and Alternative Splicing
Source: MDPI journal article supplement (doi:10.3390/ijms22158285), 2021-07-31

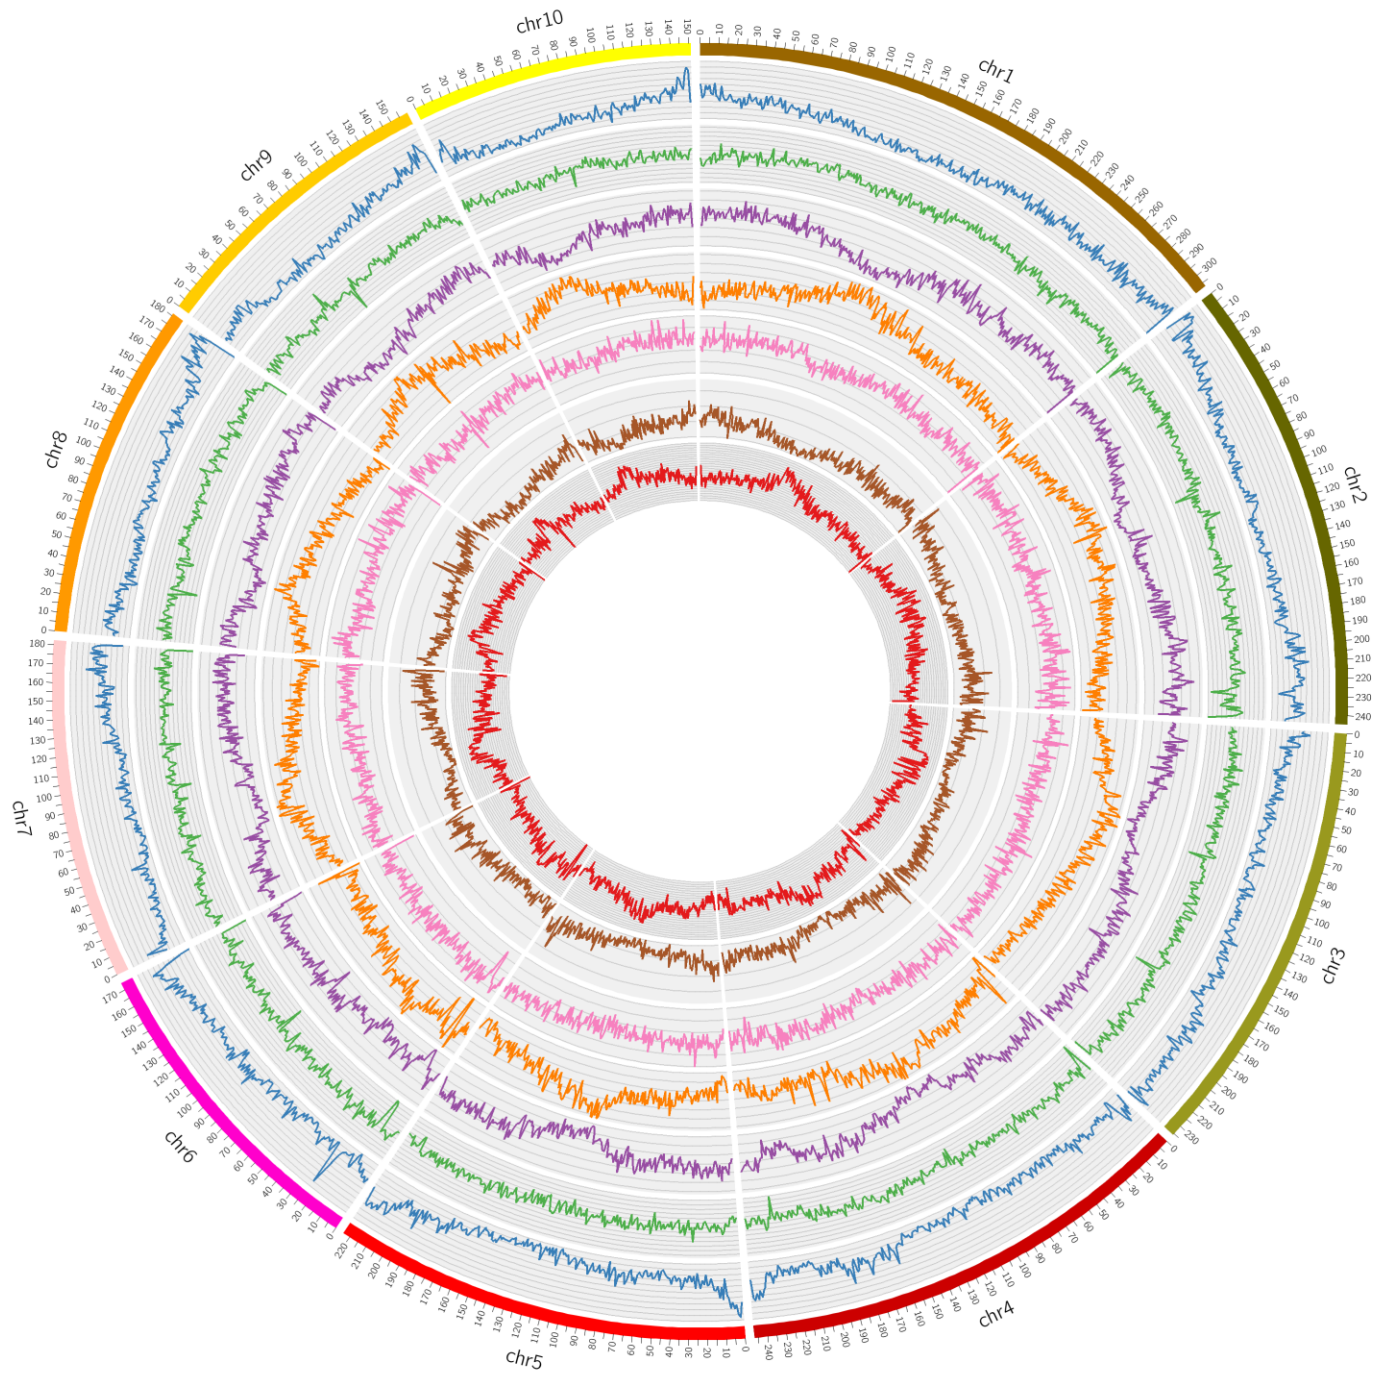

A

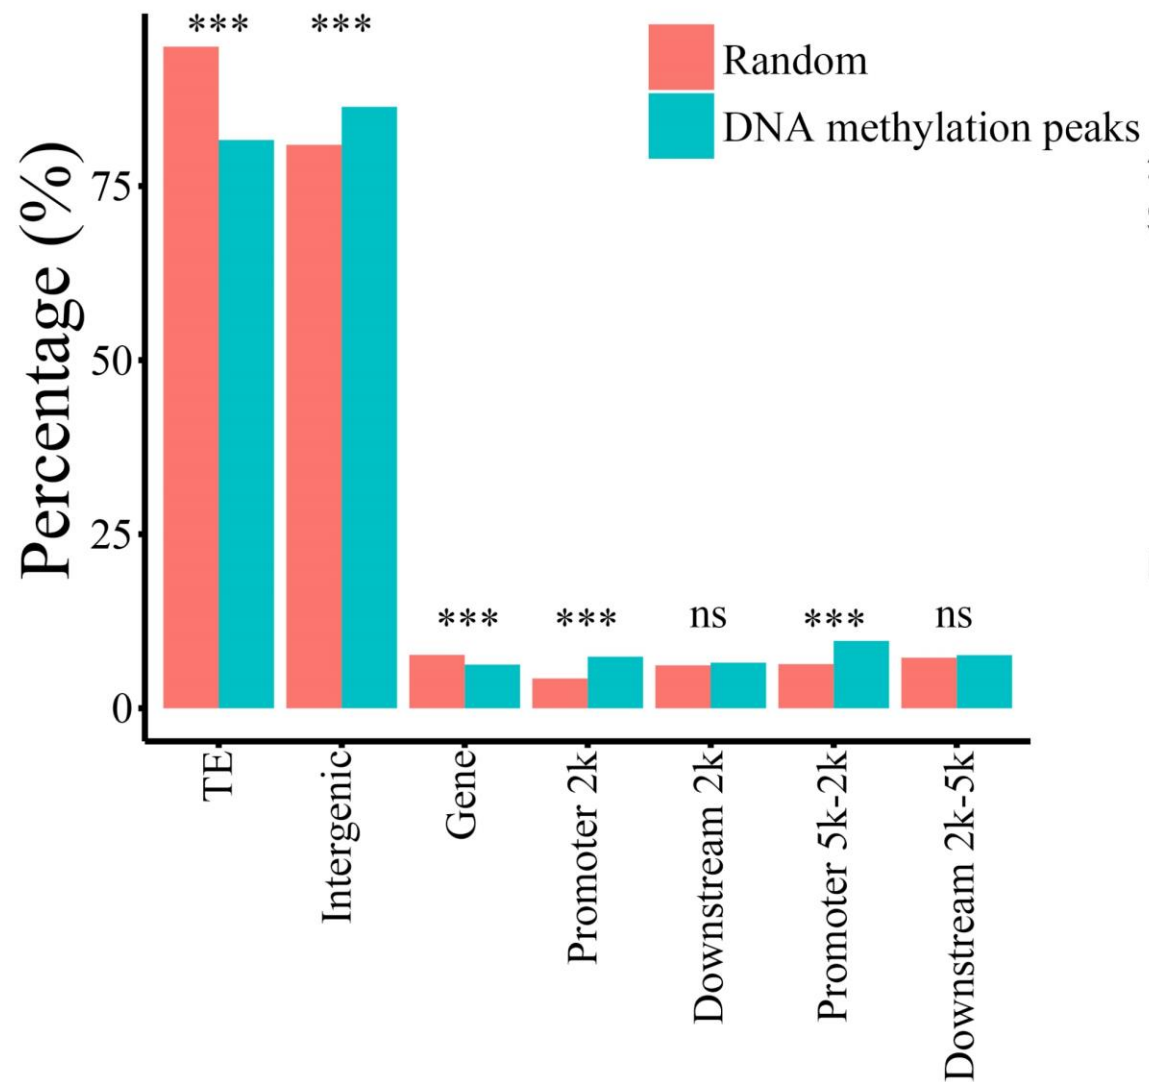

B

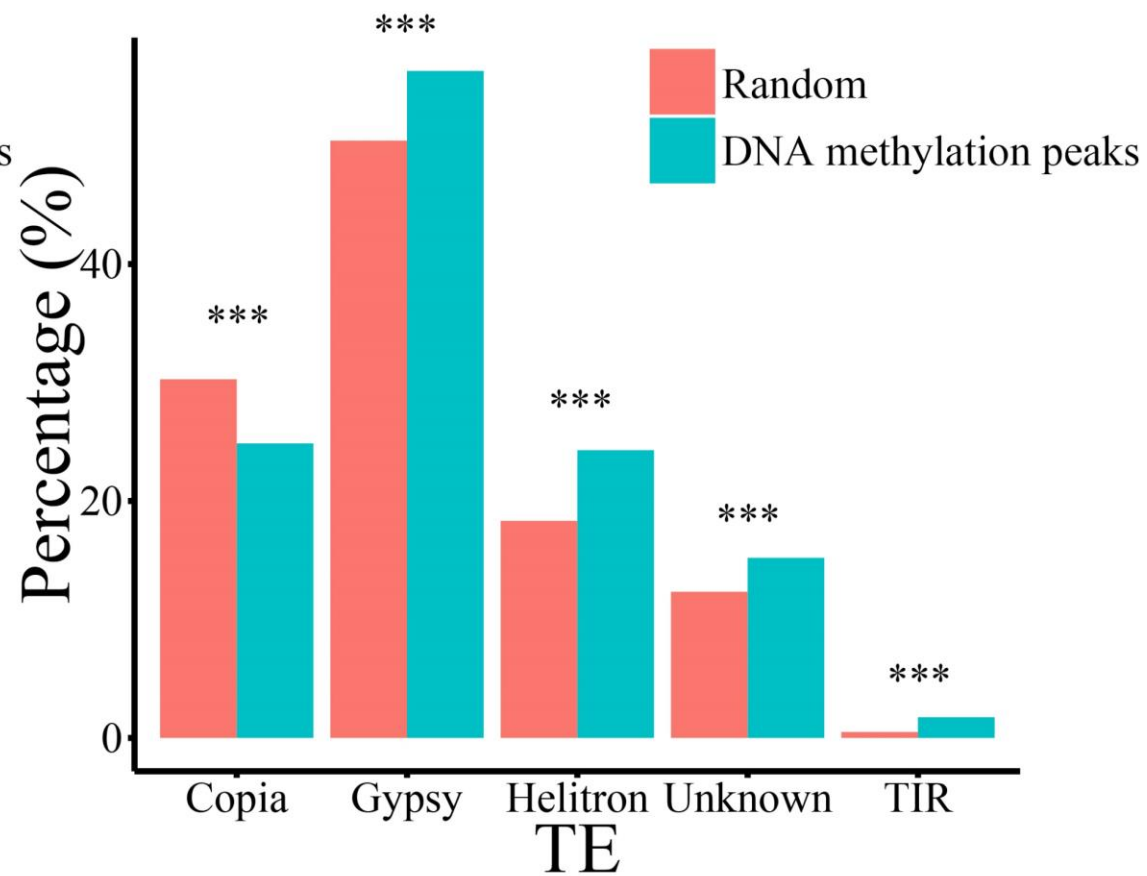

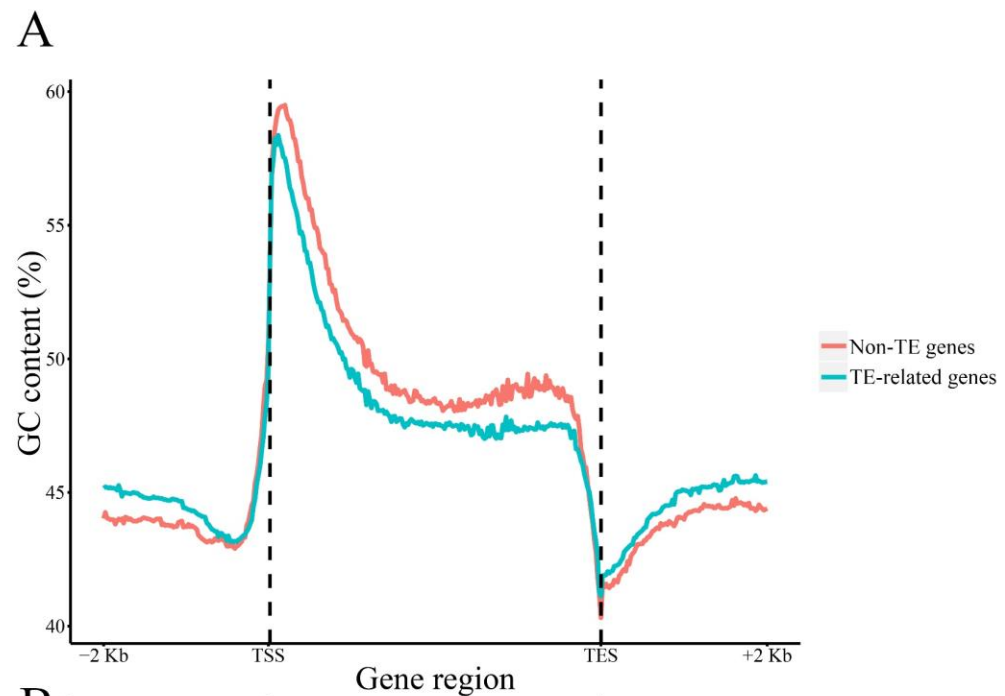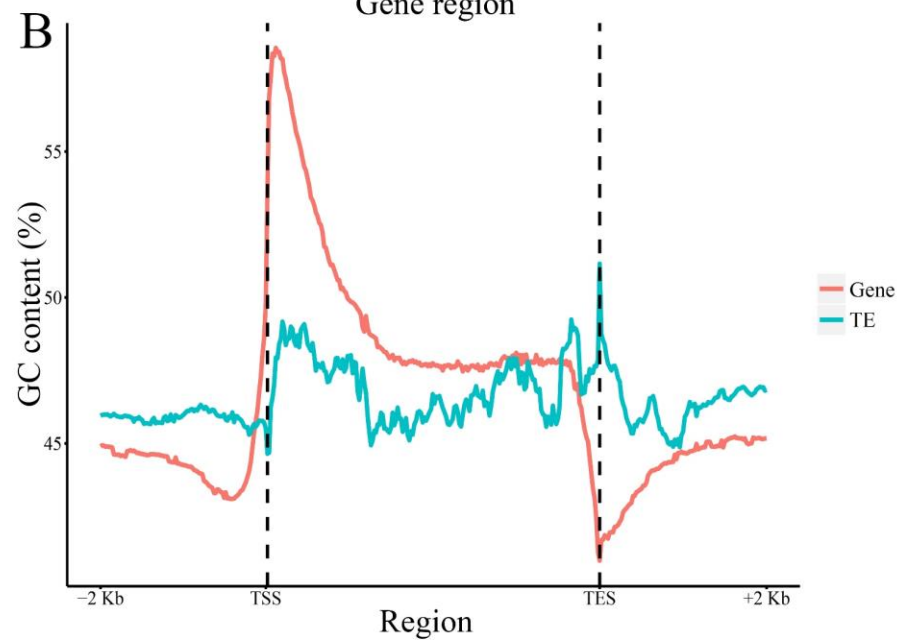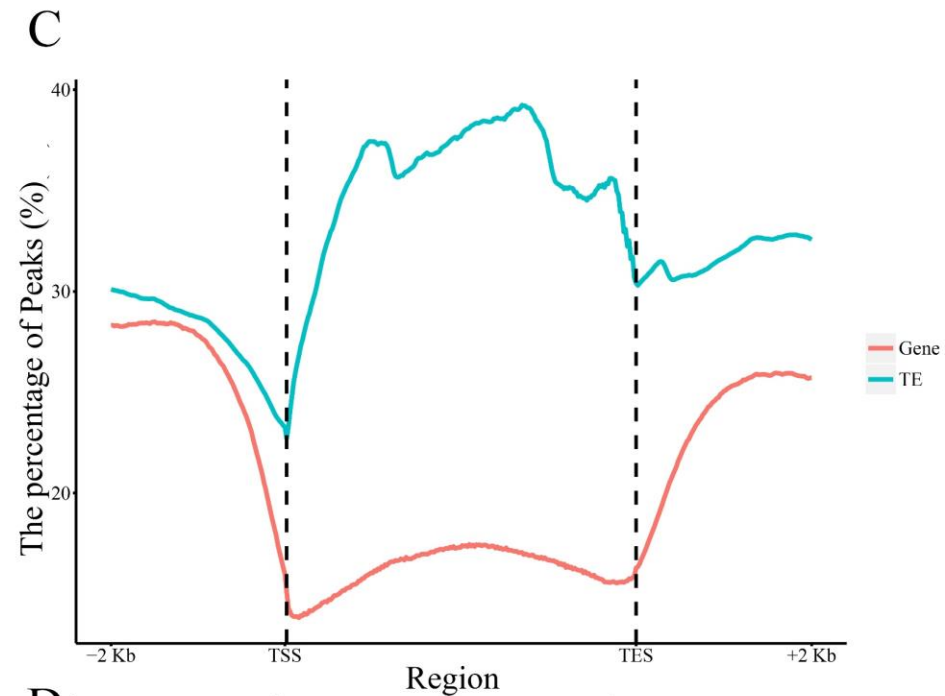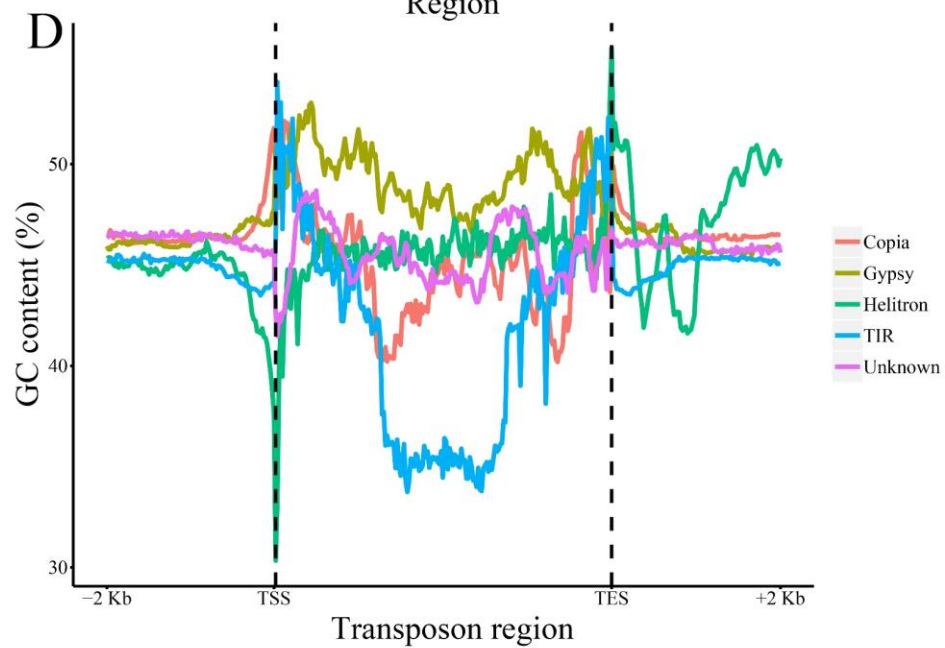

**A**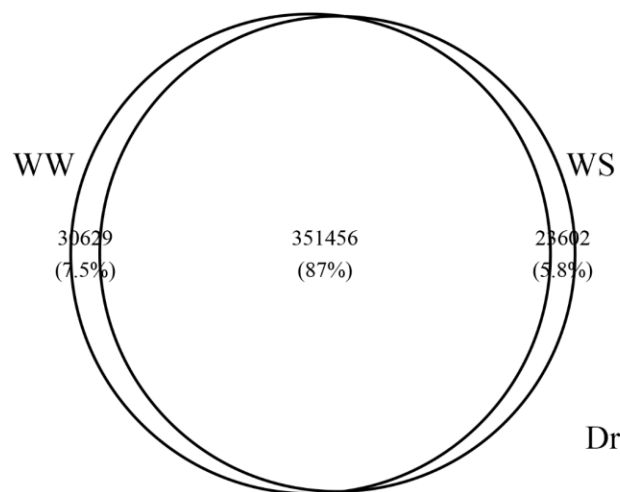**B**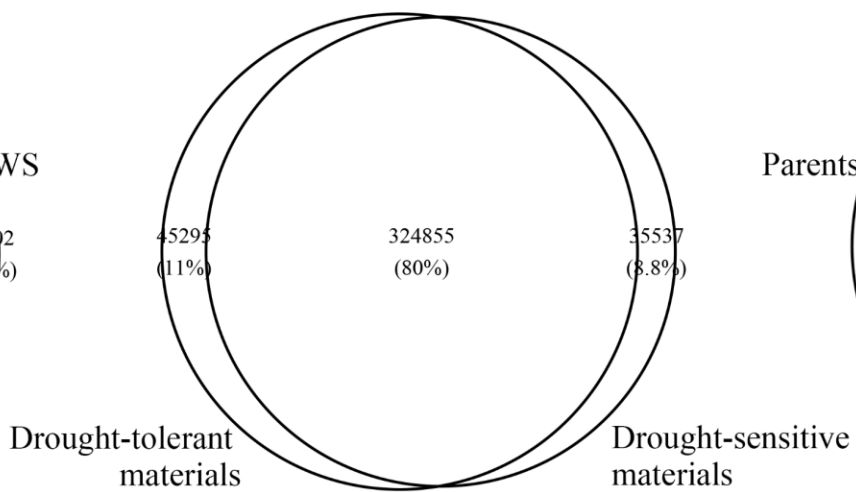**C**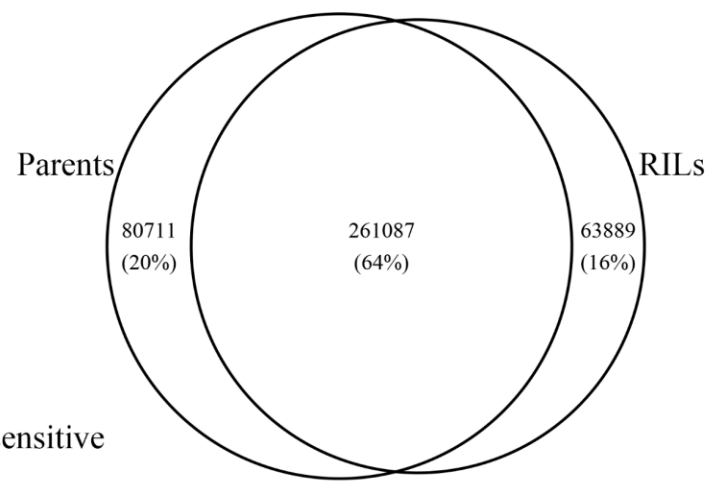**D**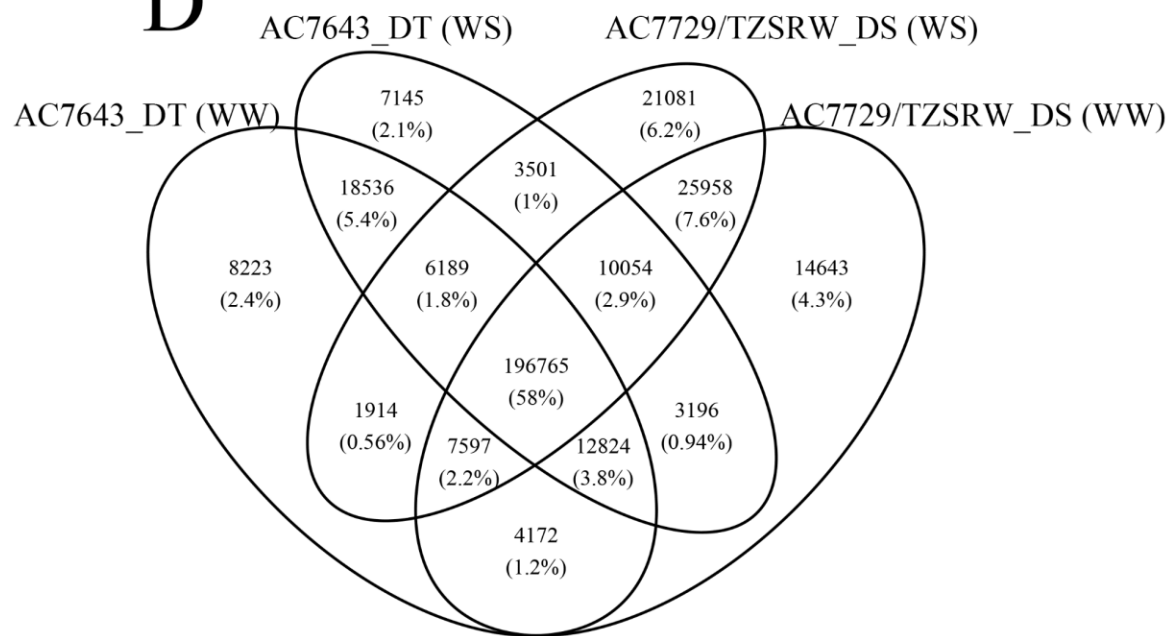**E**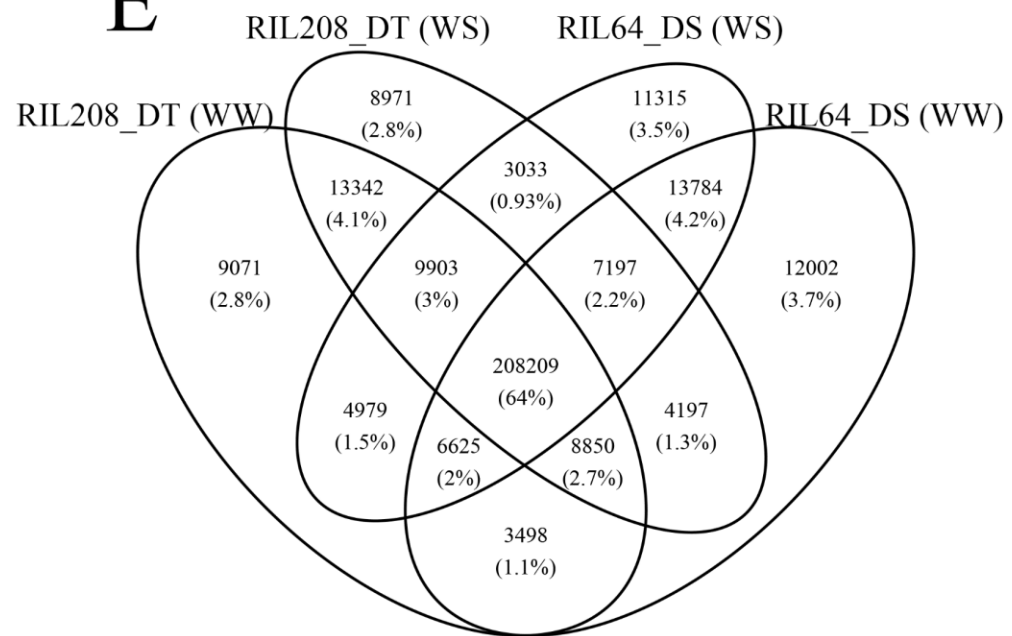

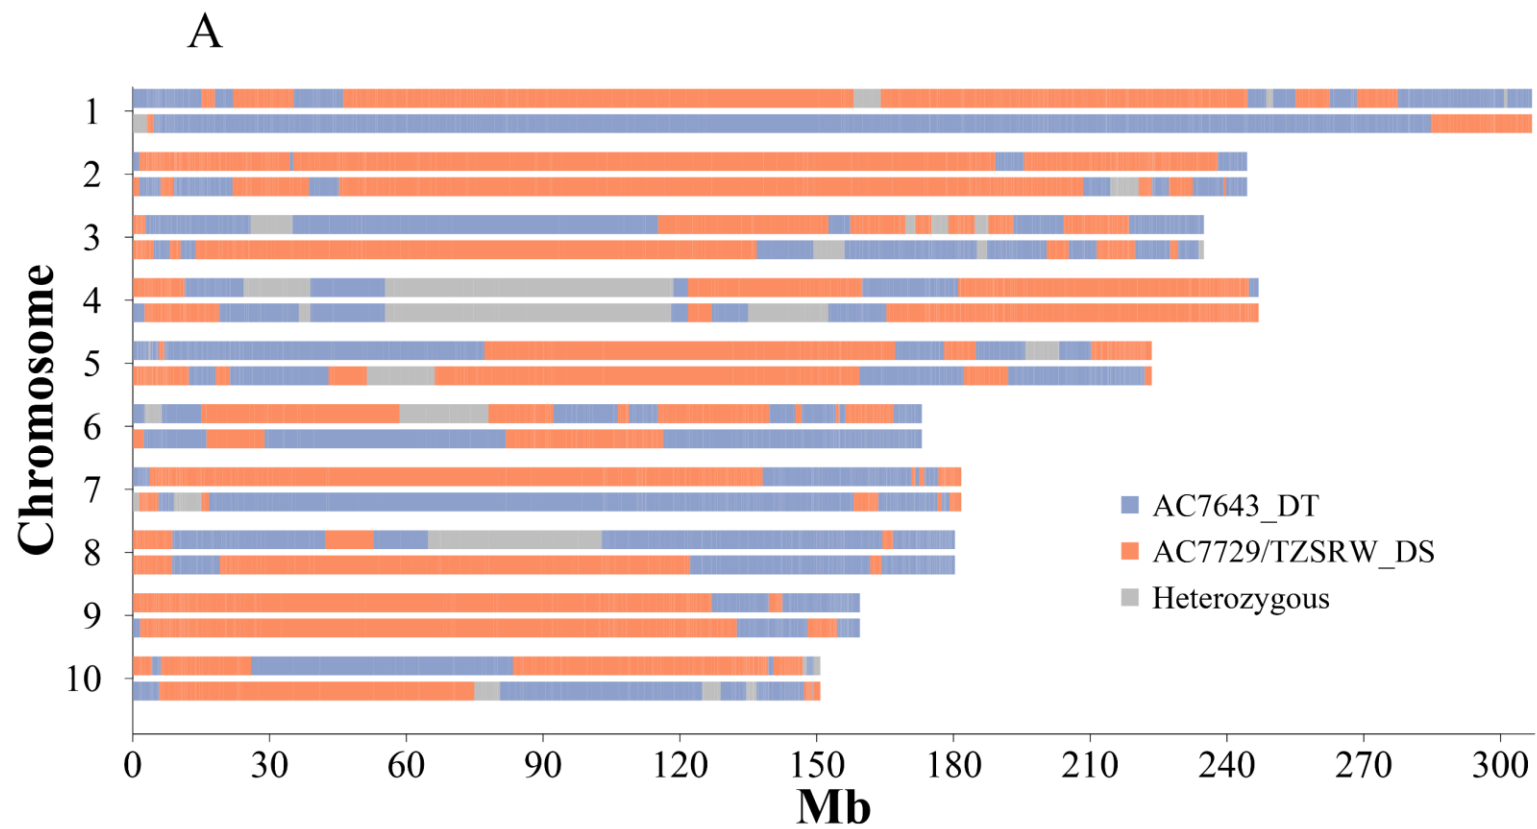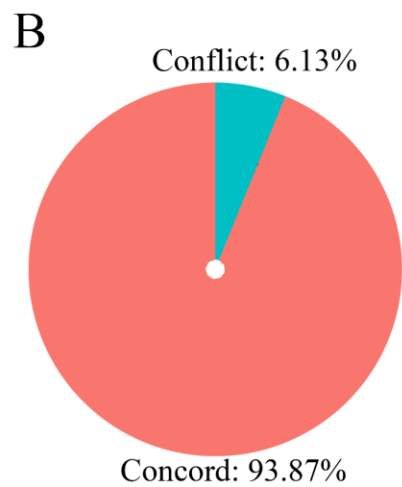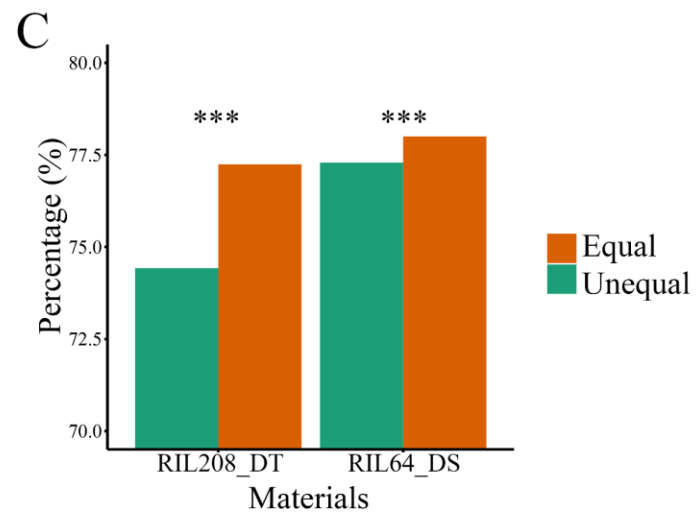



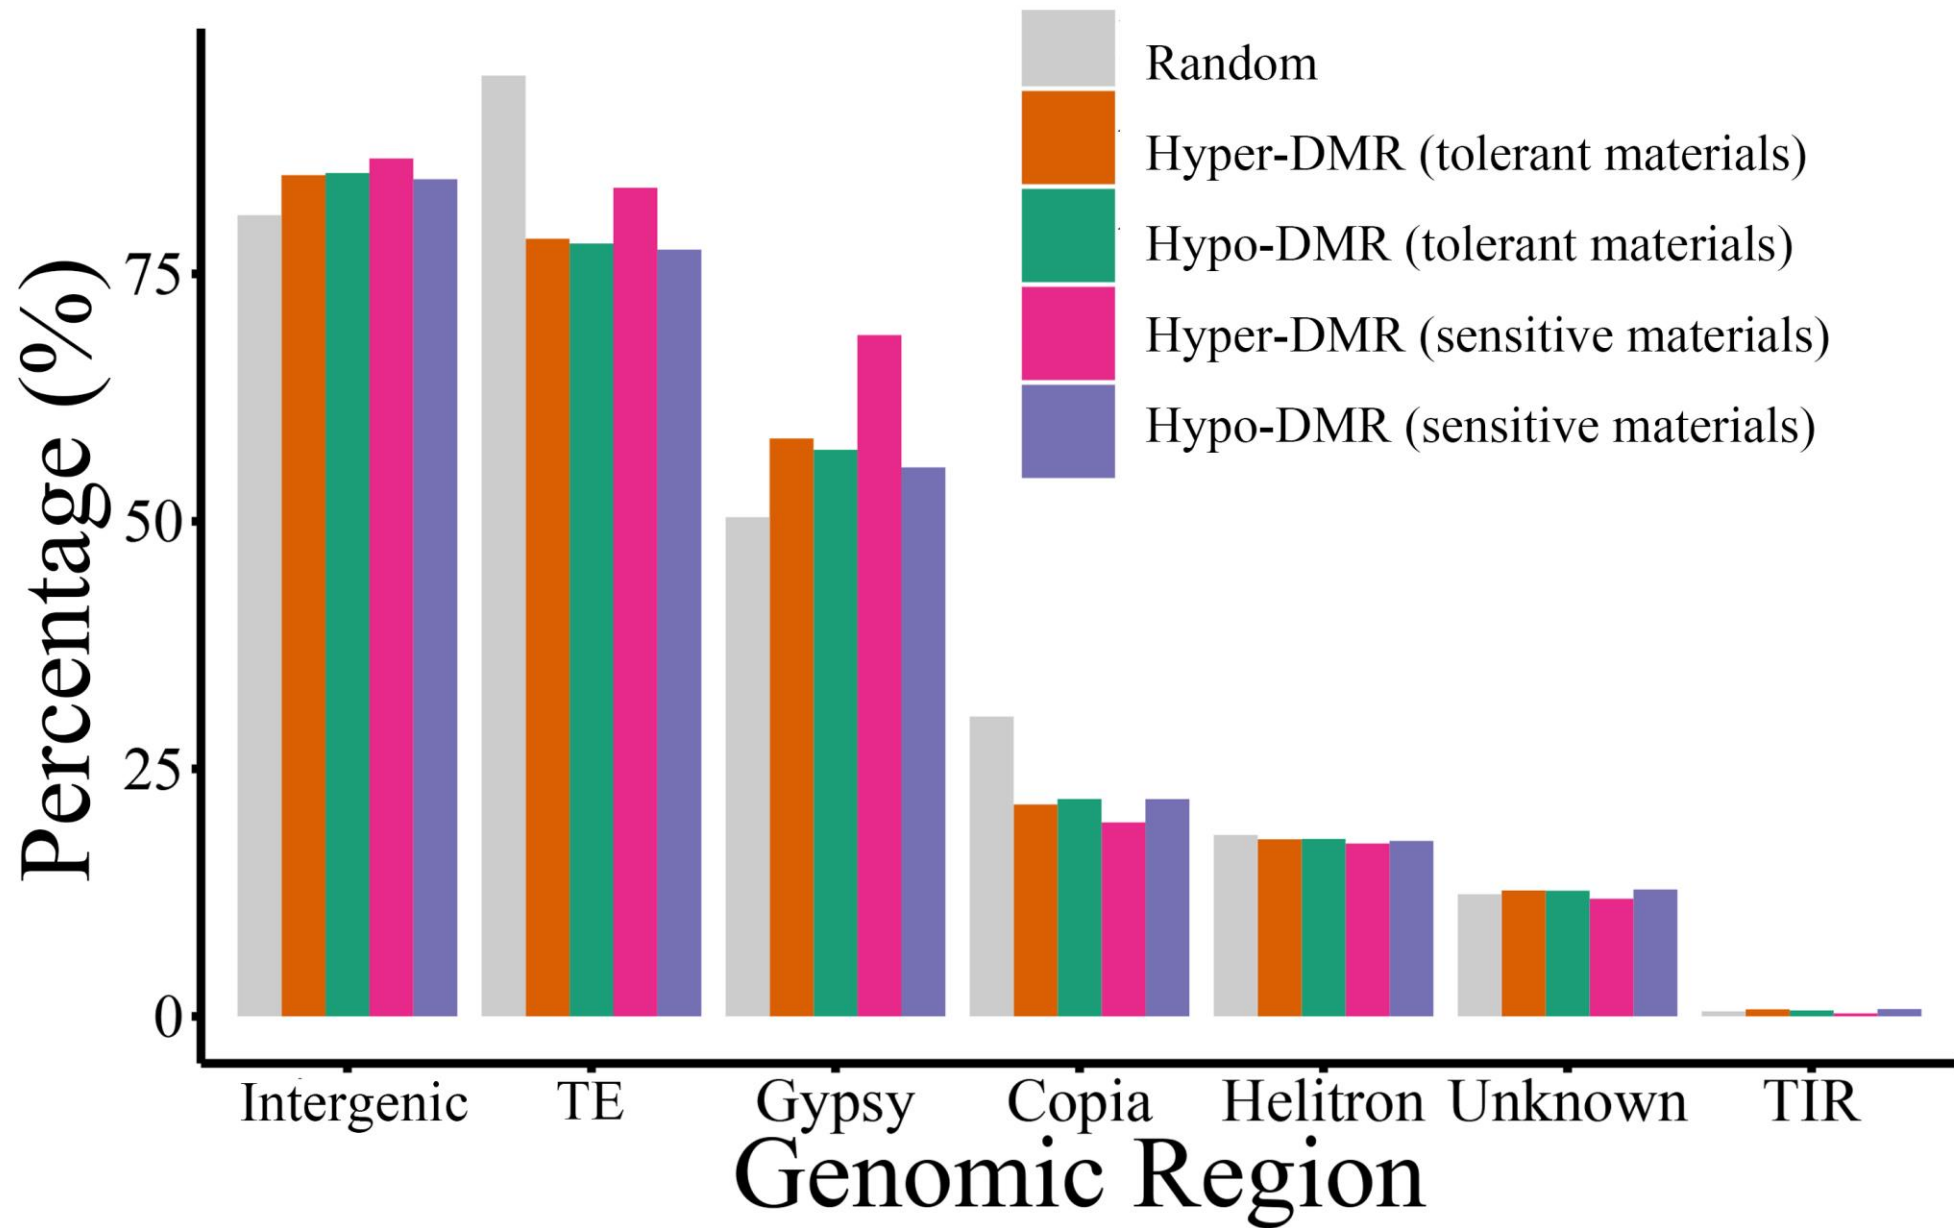



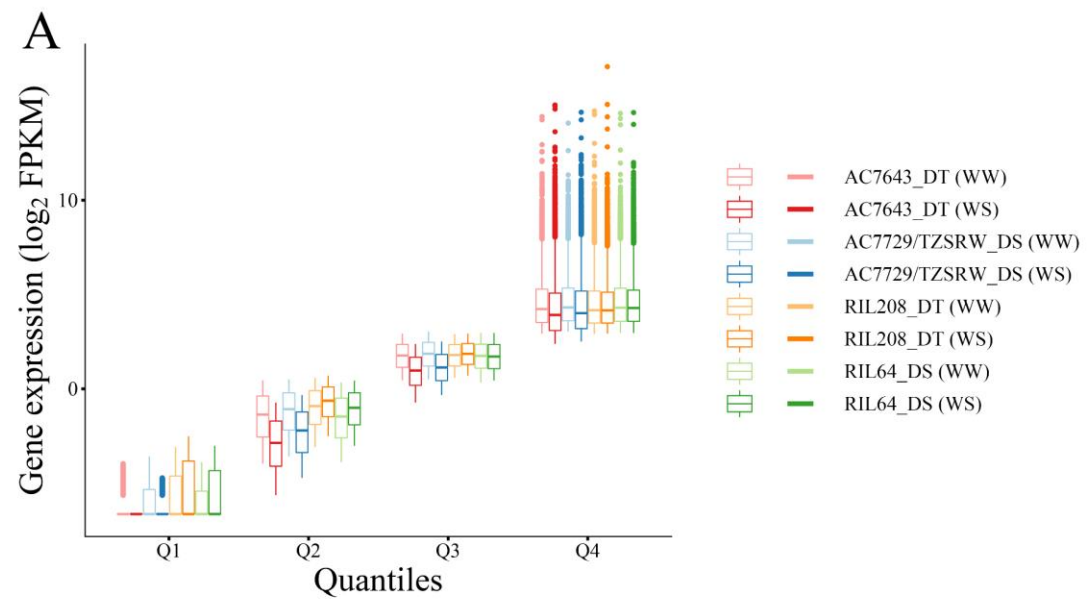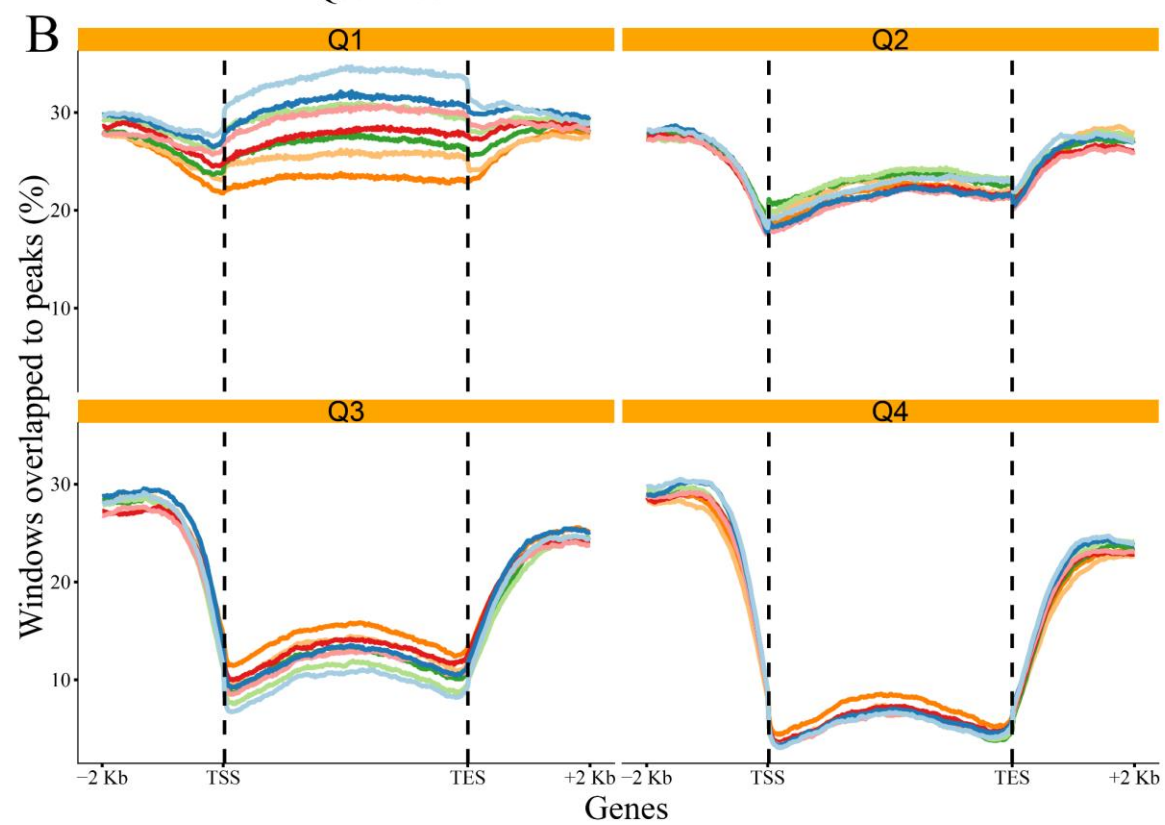



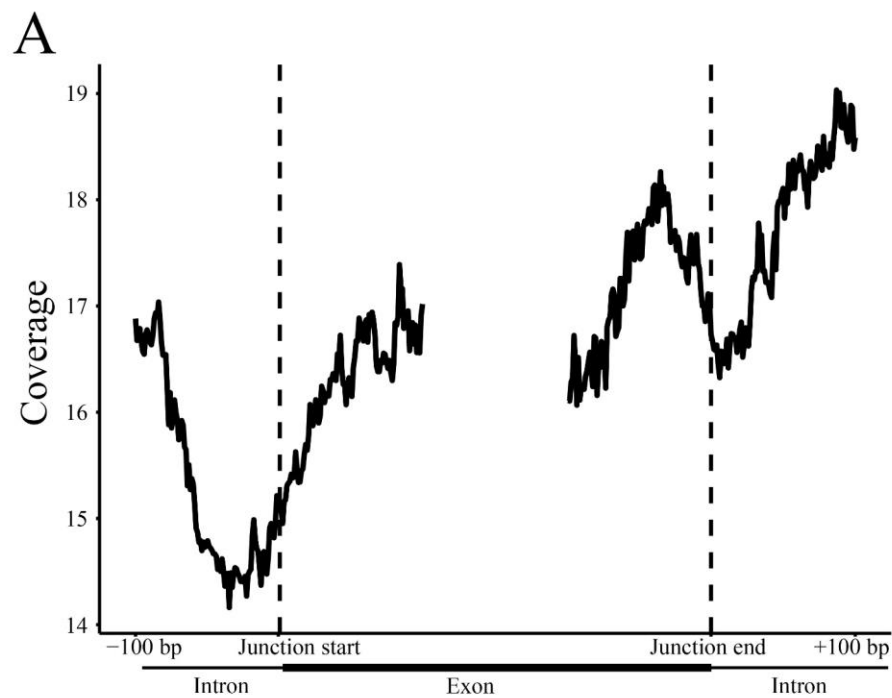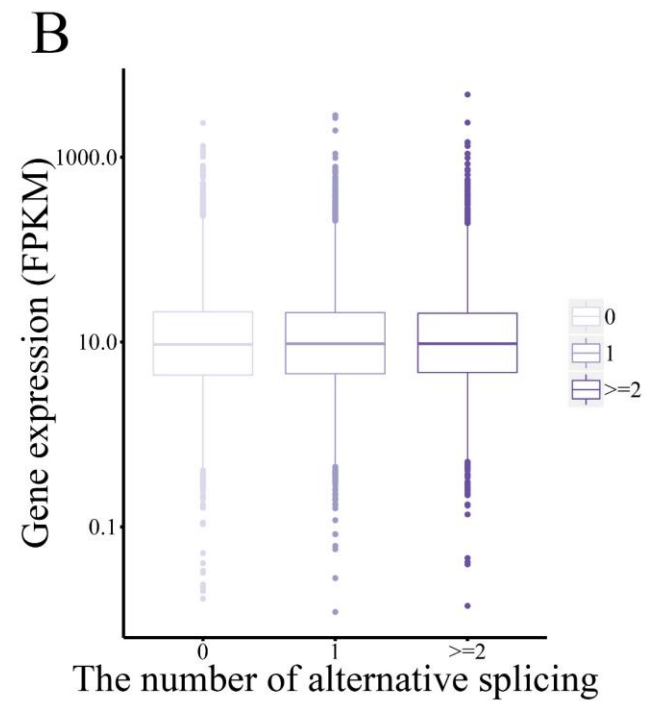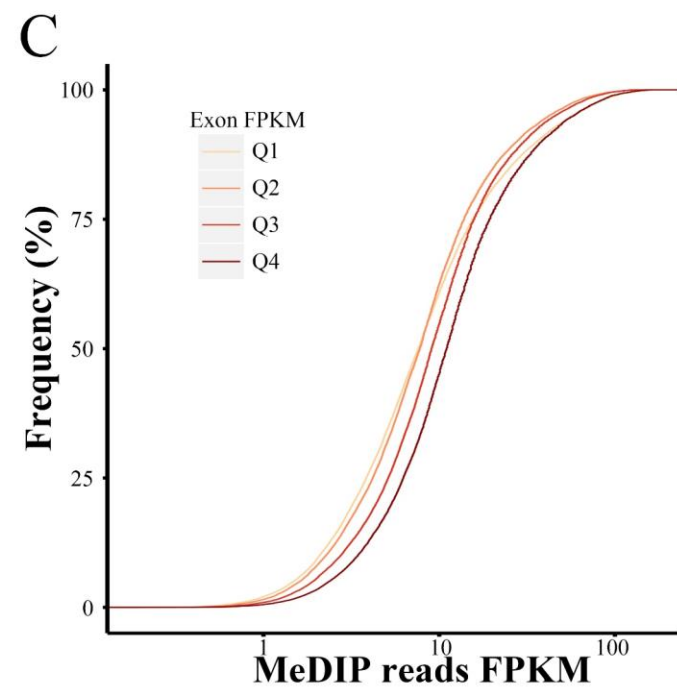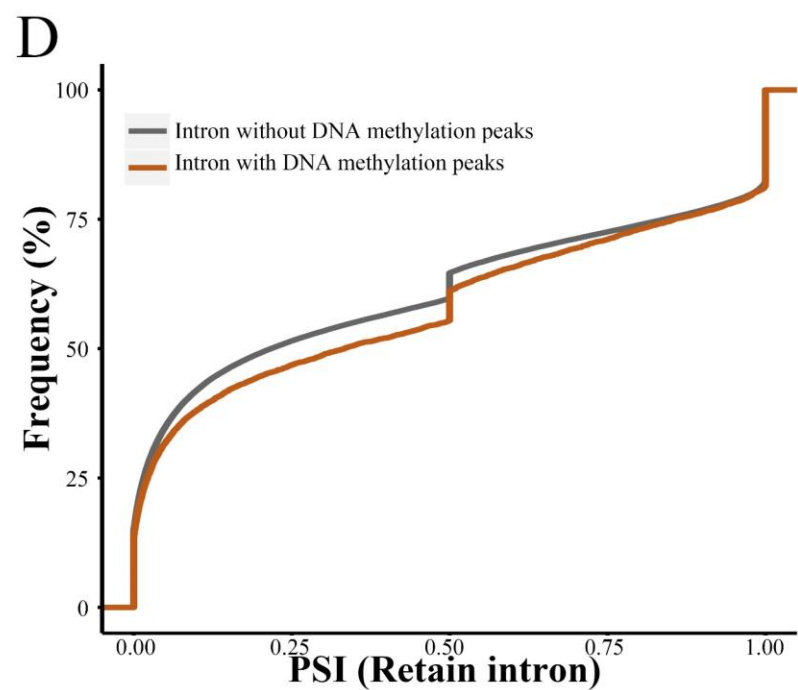

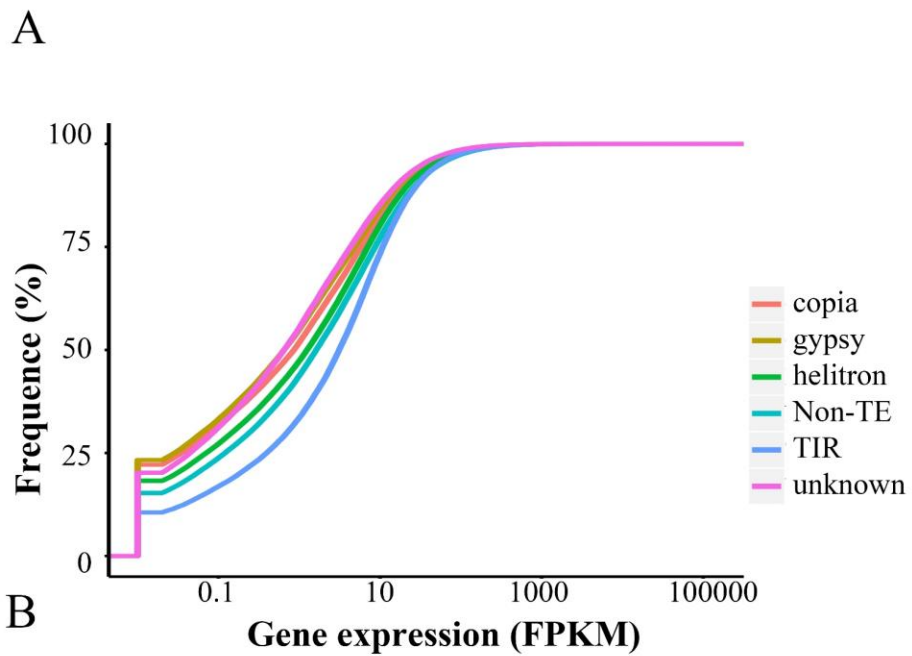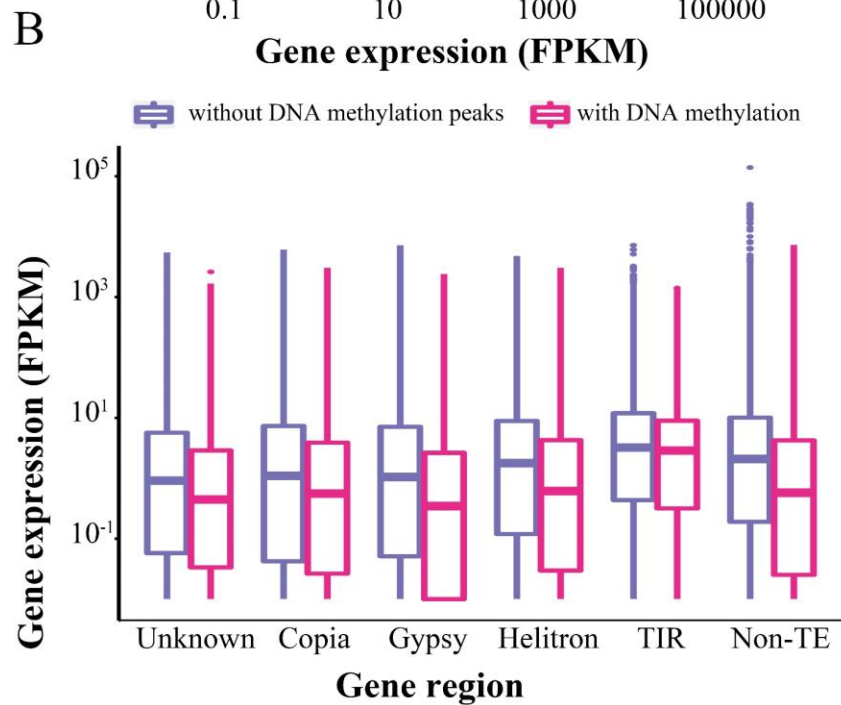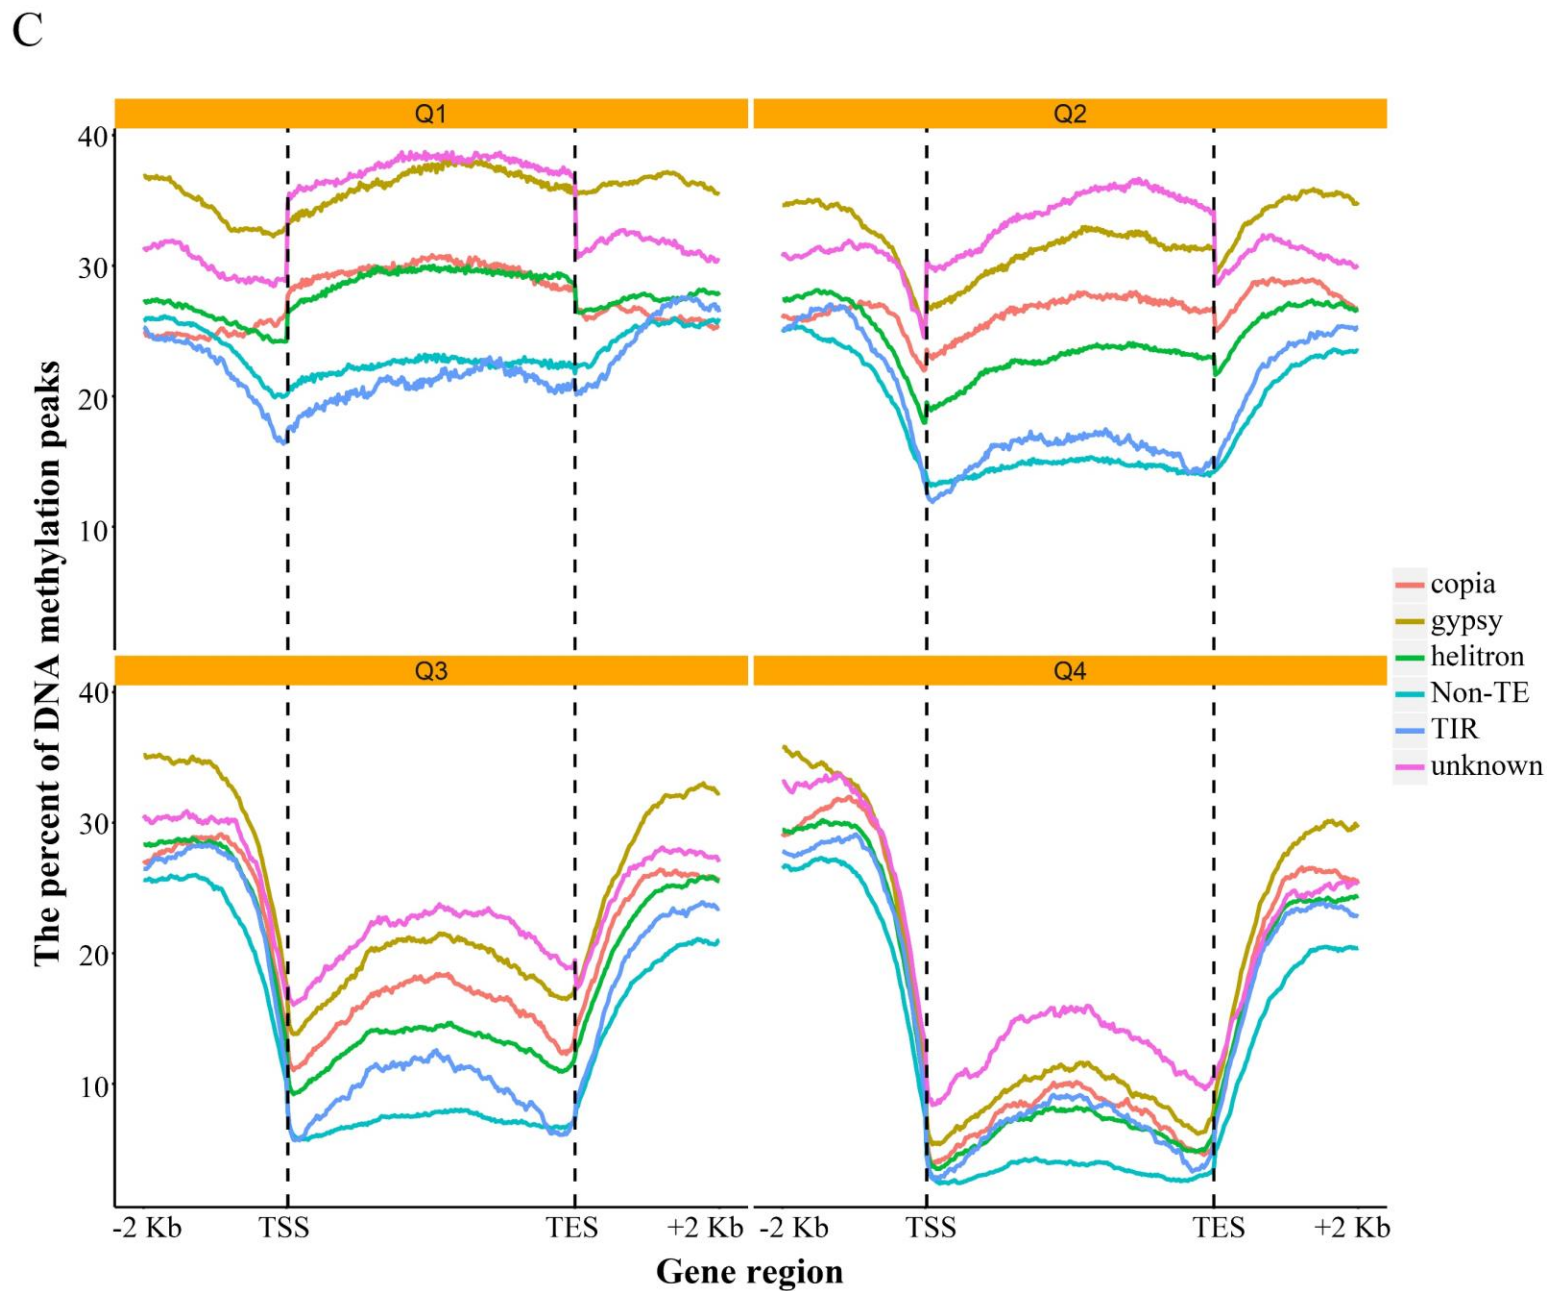

A

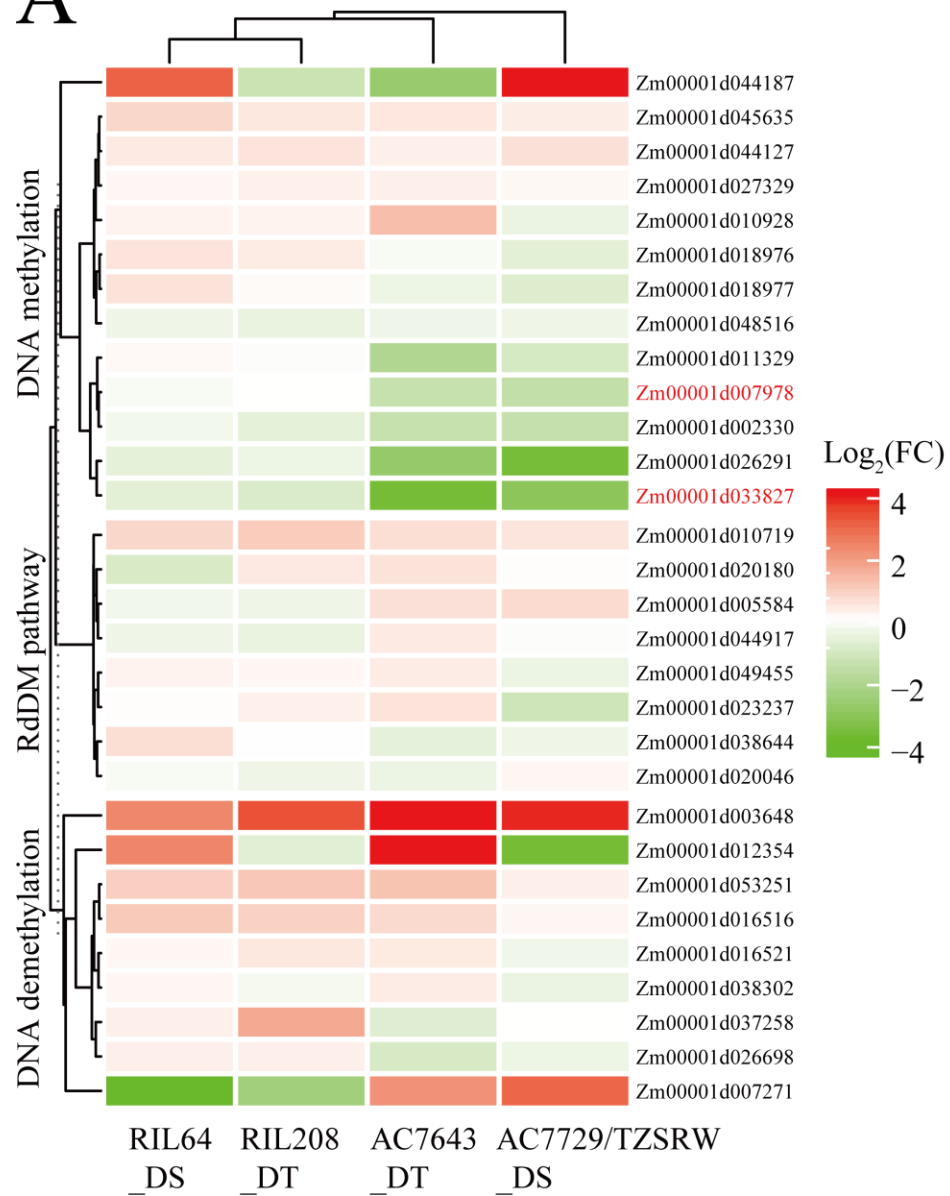

B

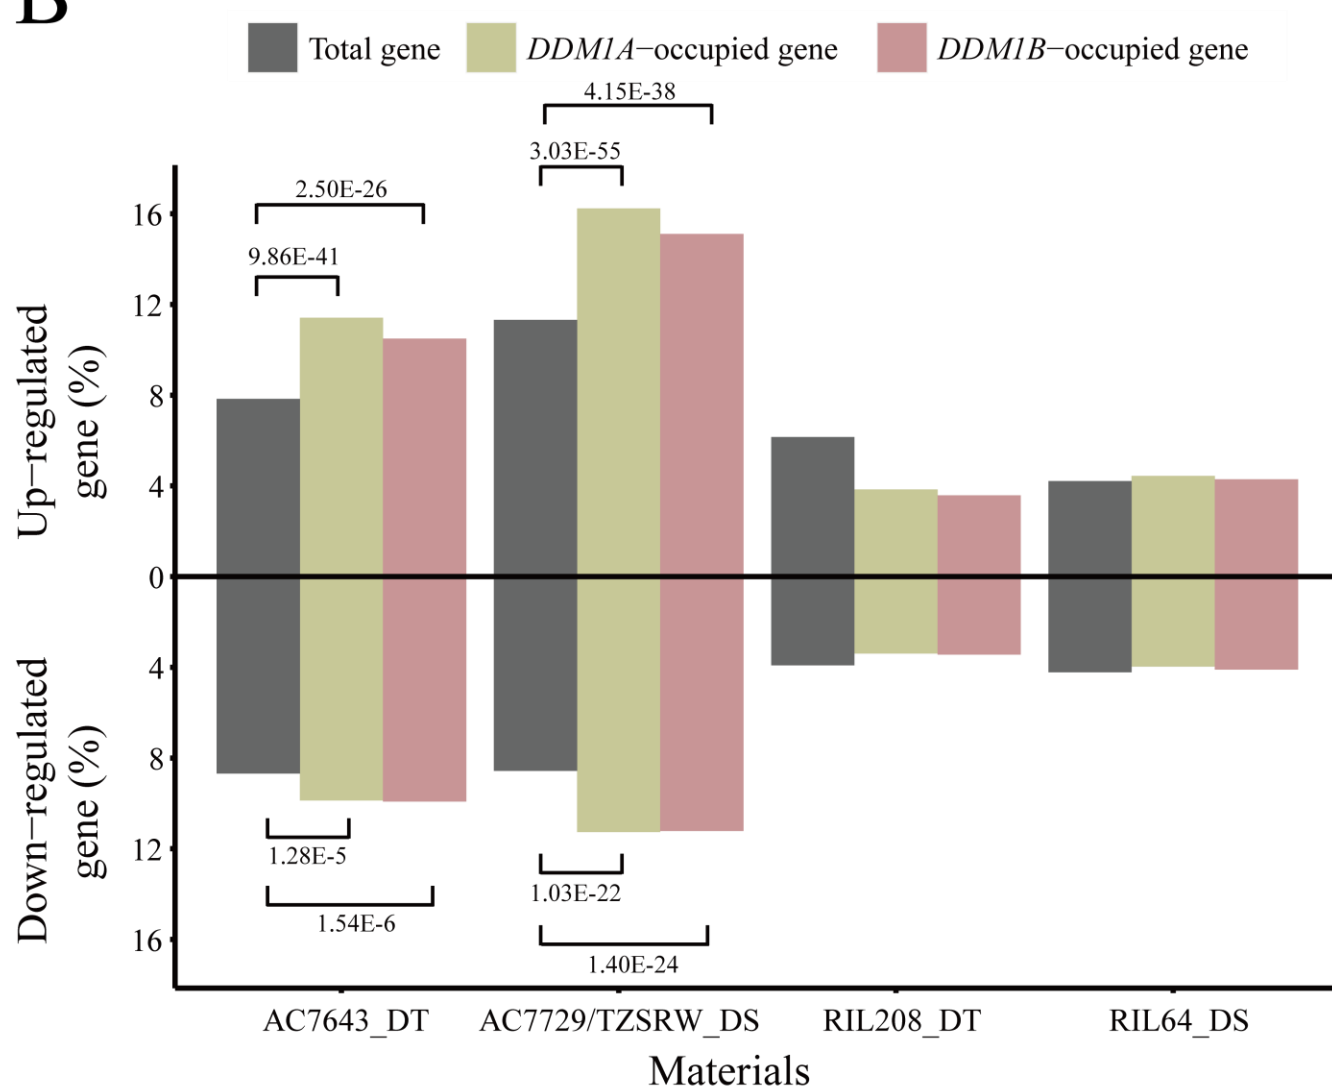

Supplement: s1 [file s1]
